# Supplementary figures and images for: Dysregulated levels of glycogen synthase kinase-3β (GSK-3β) and miR-135 in peripheral blood samples of cases with nephrotic syndrome
Source: PeerJ journal article supplement (doi:10.7717/peerj.10377), 2020-12-16

miR-135 in plasma

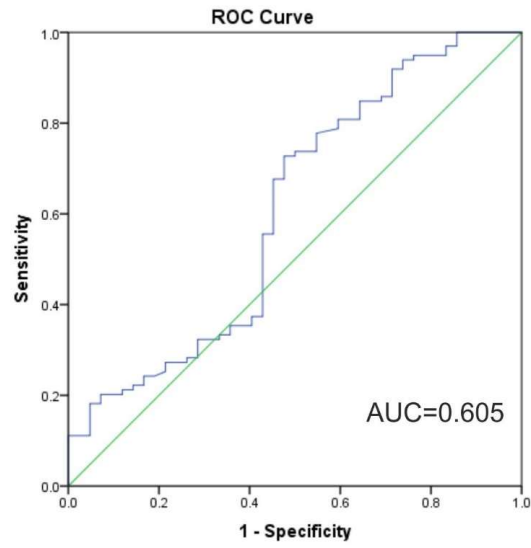

miR-135 in PBMCs

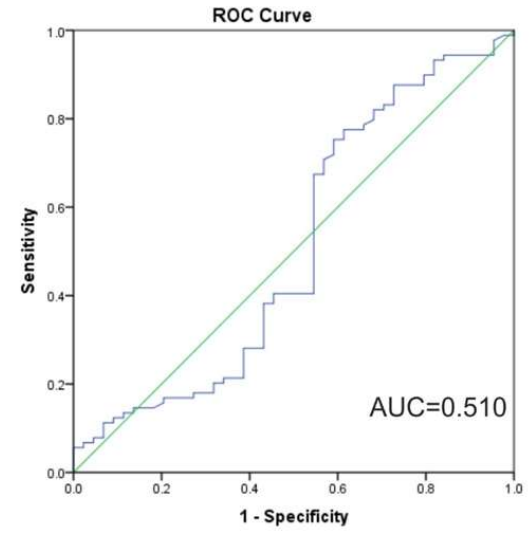

Supplement: ROC-miR-135_Figure_S1.pdf [file ROC-miR-135_Figure_S1.pdf]
